# Supplementary material for: Stigmergy: A key driver of self-organization in bacterial biofilms
Source: PubMed Central journal article supplement — Commun Integr Biol. 2013 Dec 17;6(6):e27331. doi: 10.4161/cib.27331 (PMC3984292; doi:10.4161/cib.27331), 2013-12-17
Supplement: cib-6-e27331-s02.pdf [file cib-6-e27331-s02.pdf]

## **Supplemental Material to:**

**Erin S Gloag, Muhammad A Javed, Huabin Wang,  
Michelle L Gee, Scott A Wade, Lynne Turnbull,  
and Cynthia B Whitchurch\***

**Stigmergy: A key driver of self-organisation  
in bacterial biofilms**

**Communicative & Integrative Biology 2013; 6(6)  
<http://dx.doi.org/10.4161/cib.27331>**

**<http://www.landesbioscience.com/journals/cib/article/27331>**

**Video S1.** Emergence of pattern formation during *P. aeruginosa* interstitial biofilm expansion. Time lapse phase contrast microscopy of the expansion of a *P. aeruginosa* PAK interstitial biofilm. Time series was captured 1 frame every 2 s for a total of 1 hour (2000 frames, 4000 s). Movie is played back at 100x real time. Scale bar indicates 100  $\mu\text{m}$ .
